# Supplementary material for: Mining Disaggregase Sequence Space to Safely Counter TDP-43, FUS, and α-Synuclein Proteotoxicity
Source: PubMed Central journal article supplement — Cell Rep. Author manuscript; Available in PMC 2019 Sep 18. (PMC6750954; doi:10.1016/j.celrep.2019.07.069), 2019-08-20
Supplement: NIHMS1538548-supplement-1.pdf [file NIHMS1538548-supplement-1.pdf]

## Supplemental Information

### **Mining Disaggregase Sequence Space to Safely Counter TDP-43, FUS, and $\alpha$ -Synuclein Proteotoxicity**

Amber Tariq, JiaBei Lin, Meredith E. Jackrel, Christina D. Hesketh, Peter J. Carman, Korrie L. Mack, Rachel Weitzman, Craig Gambogi, Oscar A. Hernandez Murillo, Elizabeth A. Sweeny, Esin Gulpinar, Adam L. Yokom, Stephanie N. Gates, Keolamau Yee, Saurabh Sudesh, Jacob Stillman, Alexandra N. Rizo, Daniel R. Southworth, and James Shorter

**A** $\alpha$ -synuclein

TDP-43

FUS

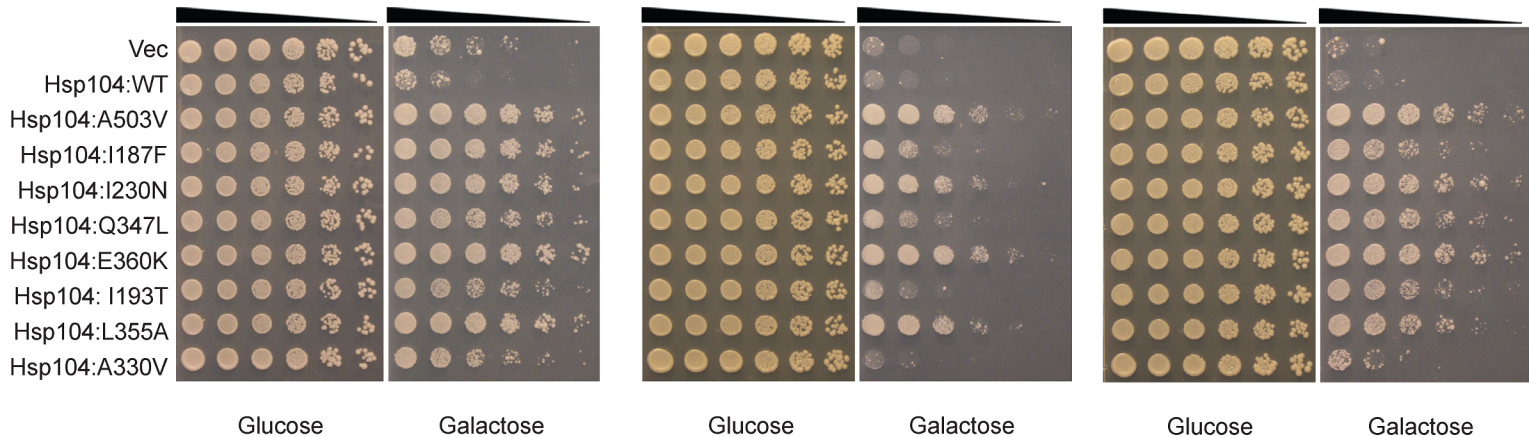**B**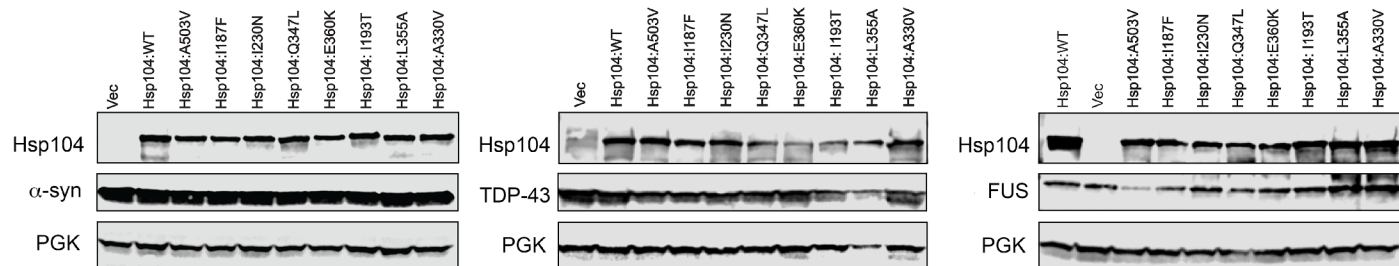

**Figure S1. Potentiated Hsp104 NBD1 variants suppress  $\alpha$ -syn, TDP-43, and FUS toxicity. Related to Figure 1, 2, and 3. (A)** NBD1 variants suppress  $\alpha$ -syn, TDP-43, and FUS toxicity in yeast. The indicated Hsp104 variants and relevant controls were transformed in yeast harboring  $\alpha$ -syn (left), TDP-43 (center), or FUS (right) genes. The strains were serially diluted five-fold and spotted in duplicate onto glucose (non-inducing) or galactose (inducing) media. **(B)** NBD1 variants do not grossly reduce  $\alpha$ -syn, TDP-43, or FUS expression in yeast. Strains in (A) were induced for 5h (FUS and TDP-43) or 8h ( $\alpha$ -syn), lysed, and immunoblotted. PGK serves as a loading control.

**A** $\alpha$ -synuclein

TDP-43

FUS

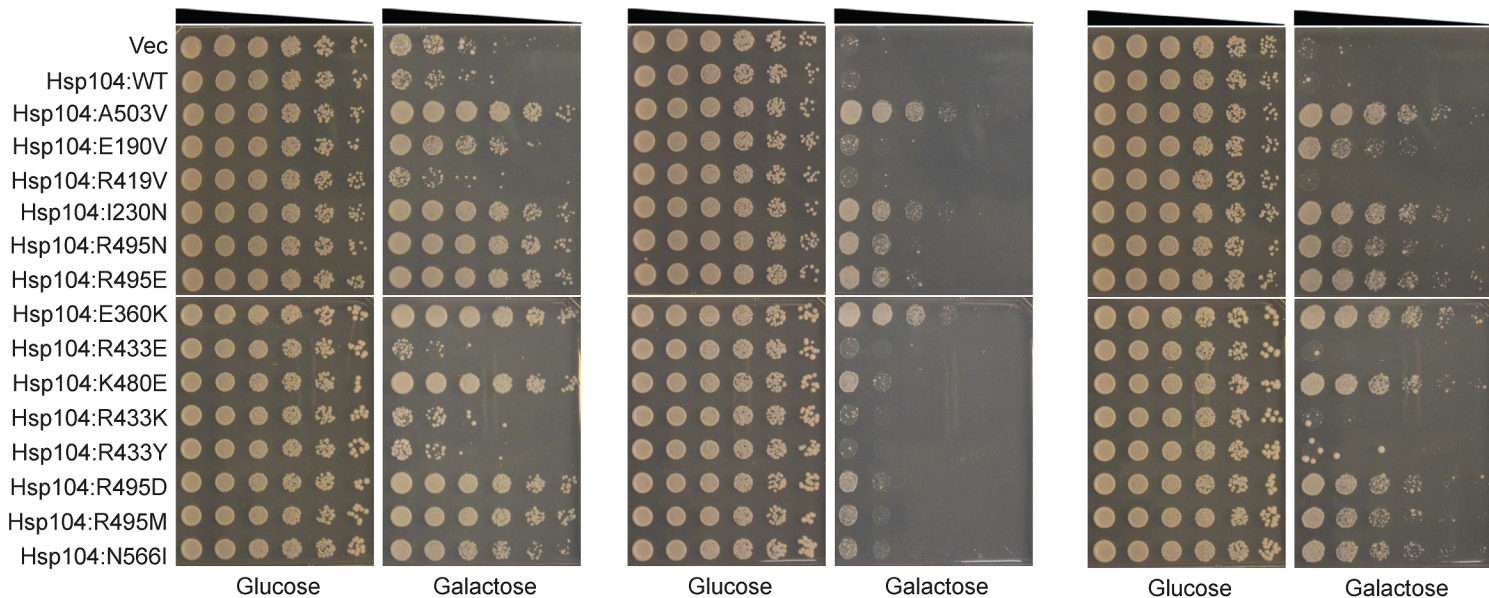**B**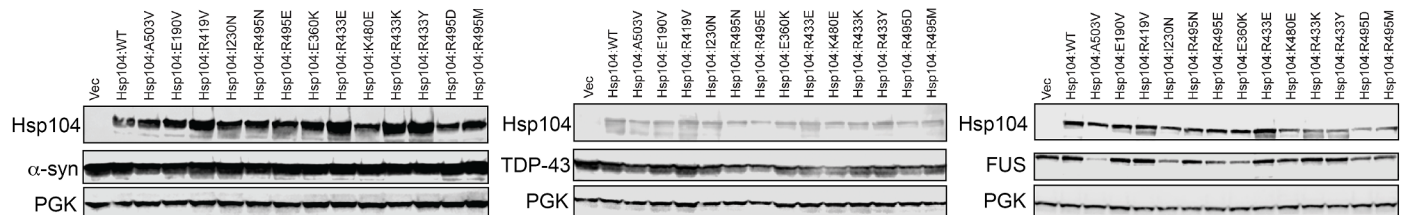

**Figure S2. Potentiated Hsp104 NBD1, NBD2, and MD variants suppress  $\alpha$ -syn, TDP-43, and FUS toxicity. Related to Figure 1, 2, and 3. (A)** Specific NBD1, MD, and NDB2 variants suppress  $\alpha$ -syn, TDP-43, and FUS toxicity in yeast. The indicated Hsp104 variants and relevant controls were transformed in yeast harboring  $\alpha$ -syn (left), TDP-43 (center), or FUS (right) genes. The strains were serially diluted five-fold and spotted in duplicate onto glucose (non-inducing) or galactose (inducing) media. Note that R419V, R433E, R433K, and R433Y are unable to rescue  $\alpha$ -syn, TDP-43, or FUS toxicity. **(B)** Strains in (A) were induced for 5h (FUS and TDP-43) or 8h ( $\alpha$ -syn), lysed, and immunoblotted. PGK serves as a loading control.

30°C

37°C

**A**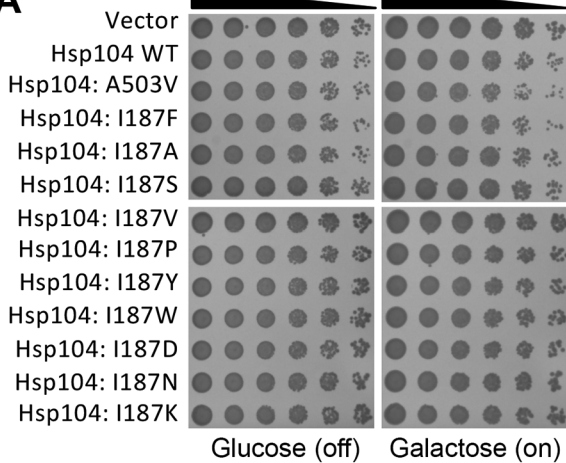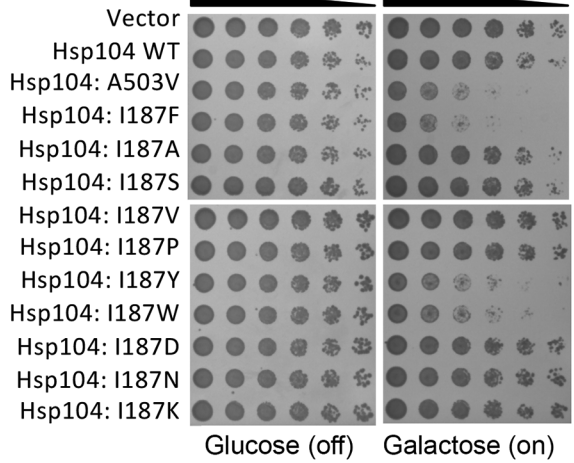**B**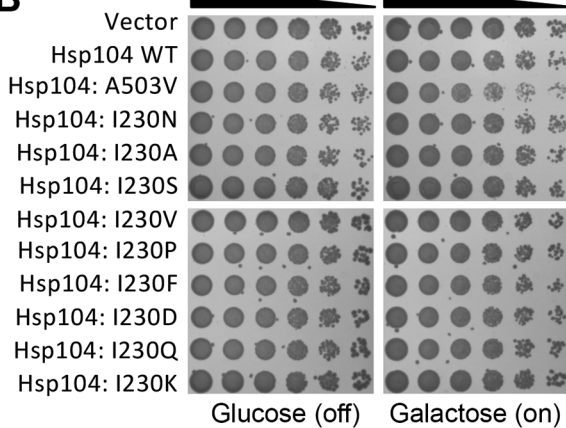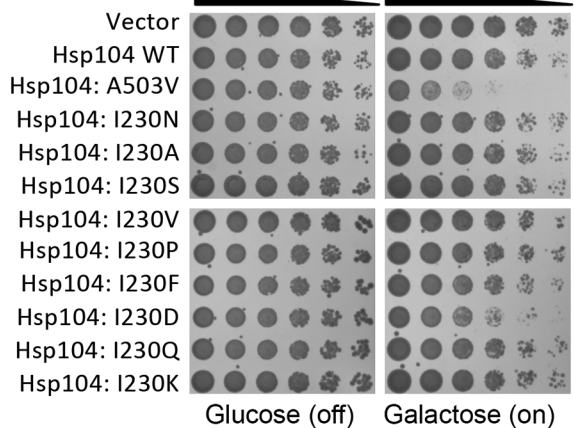**C**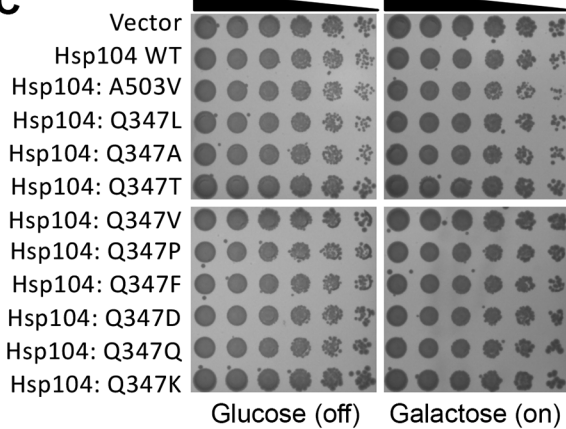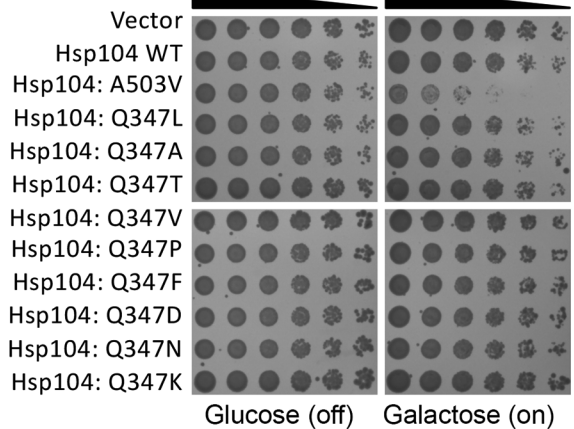**D**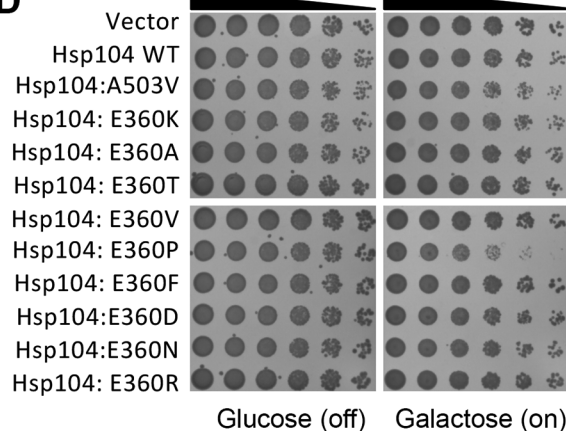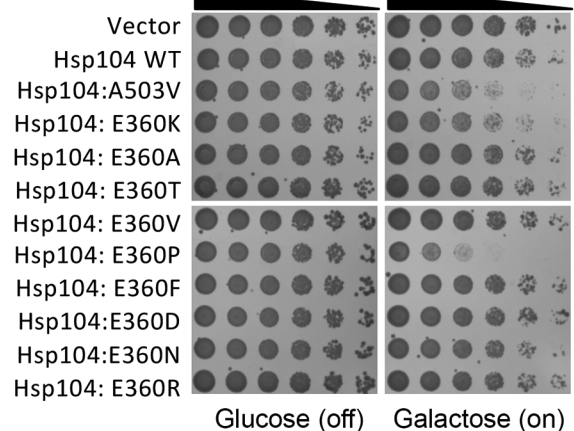

**Figure S3. Hsp104 NBD1 variants typically do not exhibit off-target toxicity.**

**Related to Figure 5. (A-D)** Hsp104 variants at the I187 position **(A)**, I230 position **(B)**, Q347 position **(C)**, or E360 position **(D)** were expressed in the 416GAL vector in *Δhsp104* yeast in the absence of any disease protein. Empty vector, Hsp104, and Hsp104<sup>A503V</sup> serve as controls. The strains were serially diluted five-fold and spotted in duplicate onto glucose (non-inducing) and galactose (inducing) media and analyzed at both 30°C (left column) and 37°C (right column).

**A**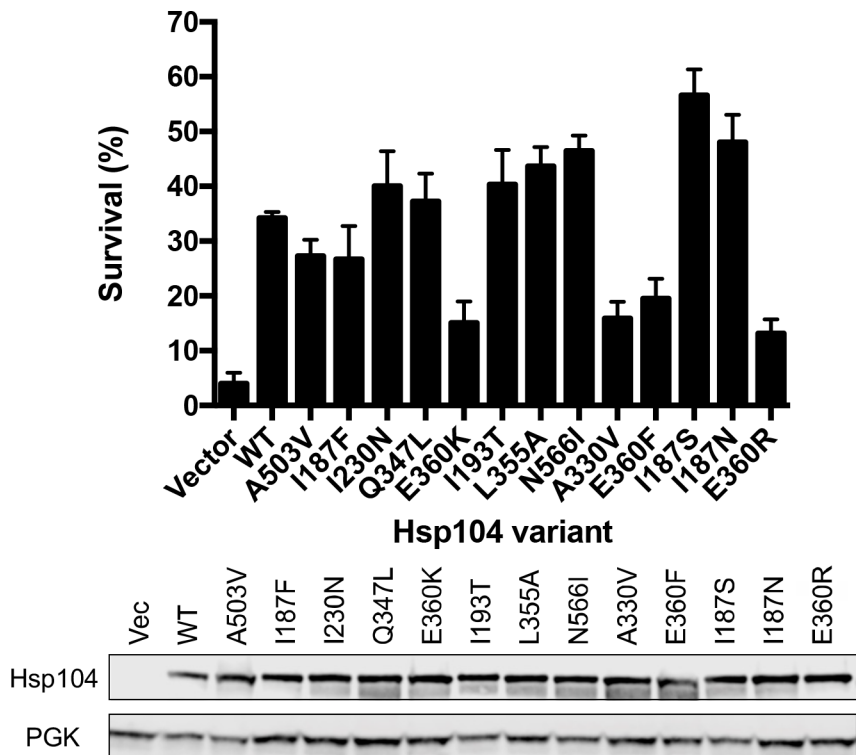**B**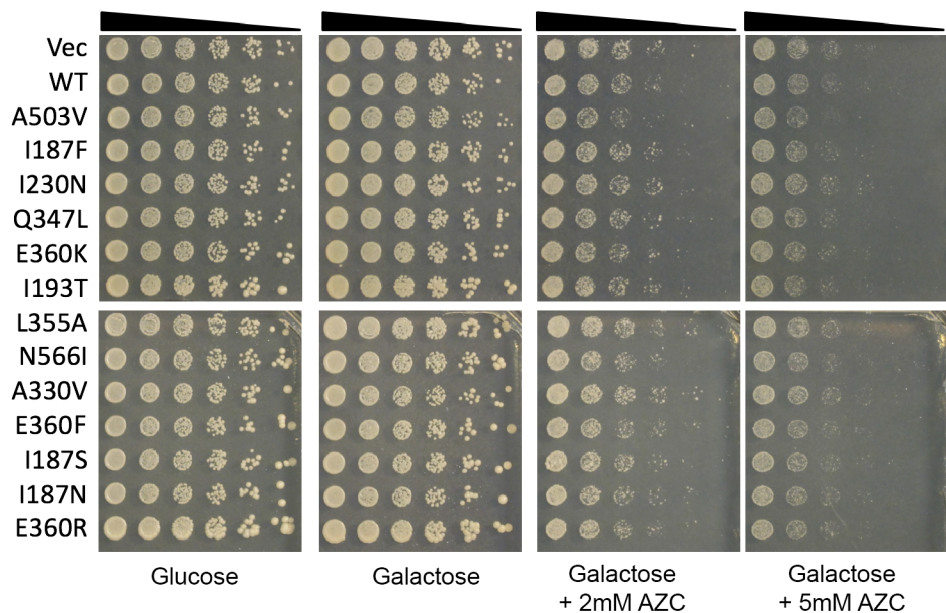

**Figure S4. Potentiated Hsp104 NBD1, NBD2, and MD variants confer thermotolerance but do not rescue AZC toxicity. Related to Figure 6. (A)**

W303aΔ*hsp104* yeast were transformed with the indicated Hsp104 variant or empty vector control. After incubation at 37°C for 30 min to induce Hsp104 expression, cells were heat shocked for 20 min at 50°C, immediately transferred to ice for 2 min, plated, and after a 2-day incubation at 30°C colonies were counted using an aCOLyte automated colony counter. Values represent means ± S.E.M. (n=4). Hsp104 expression was confirmed by immunoblot. PGK serves as a loading control. **(B)** W303aΔ*hsp104* yeast were transformed with the indicated Hsp104 variant or empty vector control. Hsp104 expression was induced in SG-Ura liquid for 6h at 30°C. The strains were serially diluted five-fold and spotted onto glucose (non-inducing), galactose (inducing), or galactose plus AZC (2mM or 5mM) media and analyzed after 3 days at 30°C.

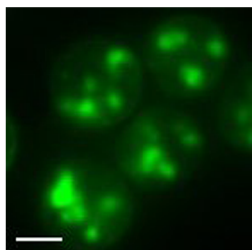

Vec

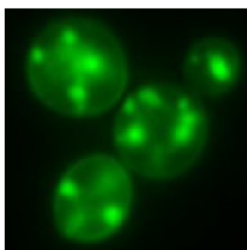

WT

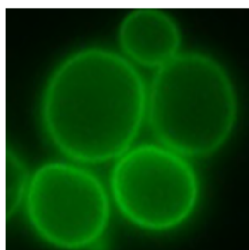

A503V

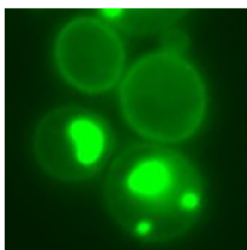

N566I

cytoplasmic foci  
membrane localization

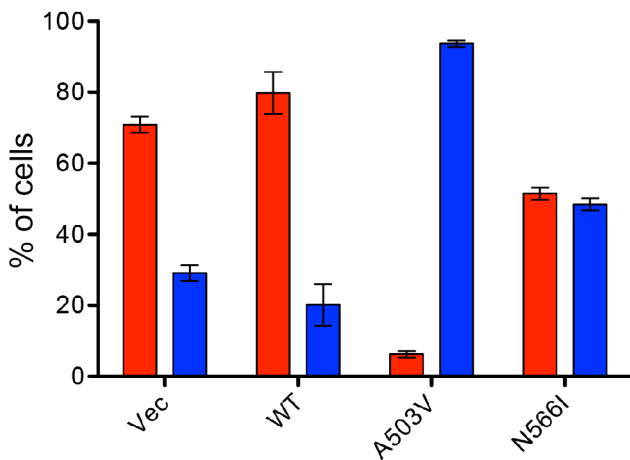

**Figure S5. Hsp104<sup>N56I</sup> rescues  $\alpha$ -syn aggregation in yeast and restores  $\alpha$ -syn to the plasma membrane. Related to Figure 7.** Fluorescence microscopy of W303a $\Delta$ *hsp104* yeast cells coexpressing  $\alpha$ -syn-YFP and the indicated Hsp104 variant or vector control.  $\alpha$ -Syn-YFP and Hsp104 expression were induced for 8h and prepared for fluorescence microscopy. Scale bar, 2.5 $\mu$ m.  $\alpha$ -Syn aggregation and localization were quantified by calculating the proportion of cells exhibiting either cytoplasmic aggregates or plasma membrane localization. Values represent means  $\pm$  SEM (n=3).

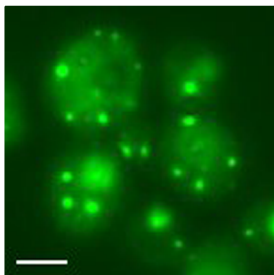

Vec

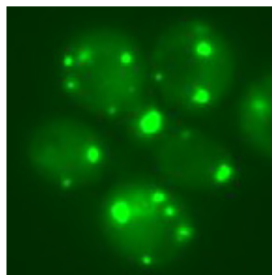

WT

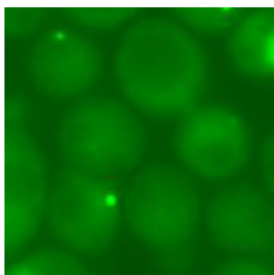

A503V

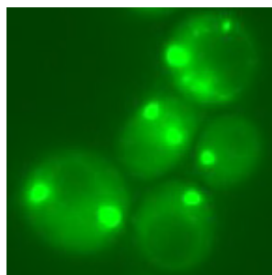

N566I

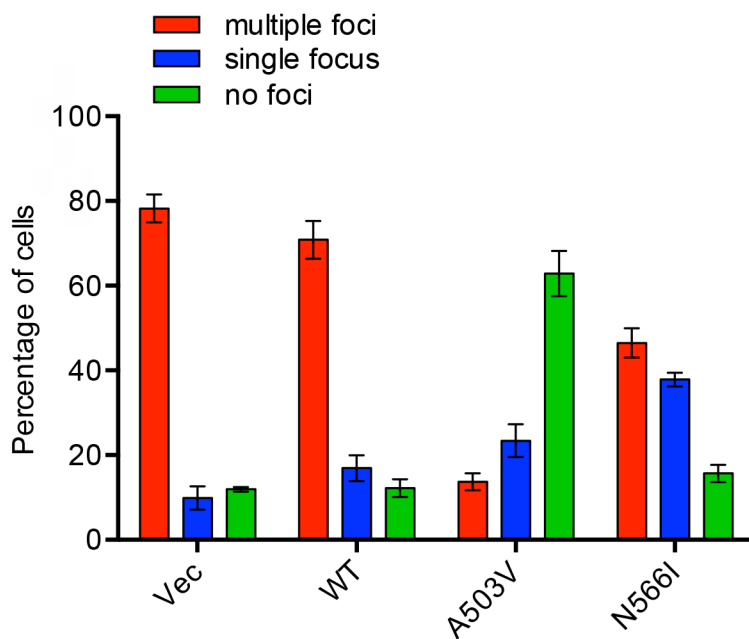

**Figure S6. Hsp104<sup>N566I</sup> rescues FUS aggregation in yeast. Related to Figure 7.**

Fluorescence microscopy of W303a $\Delta$ *hsp104* yeast cells coexpressing FUS-GFP and the indicated Hsp104 variant or vector control. FUS-GFP and Hsp104 expression were induced for 5h and prepared for fluorescence microscopy. Scale bar, 2.5 $\mu$ m. FUS aggregation was quantified by calculating the proportion of cells exhibiting cytoplasmic aggregates. Values represent means  $\pm$  SEM (n=3).

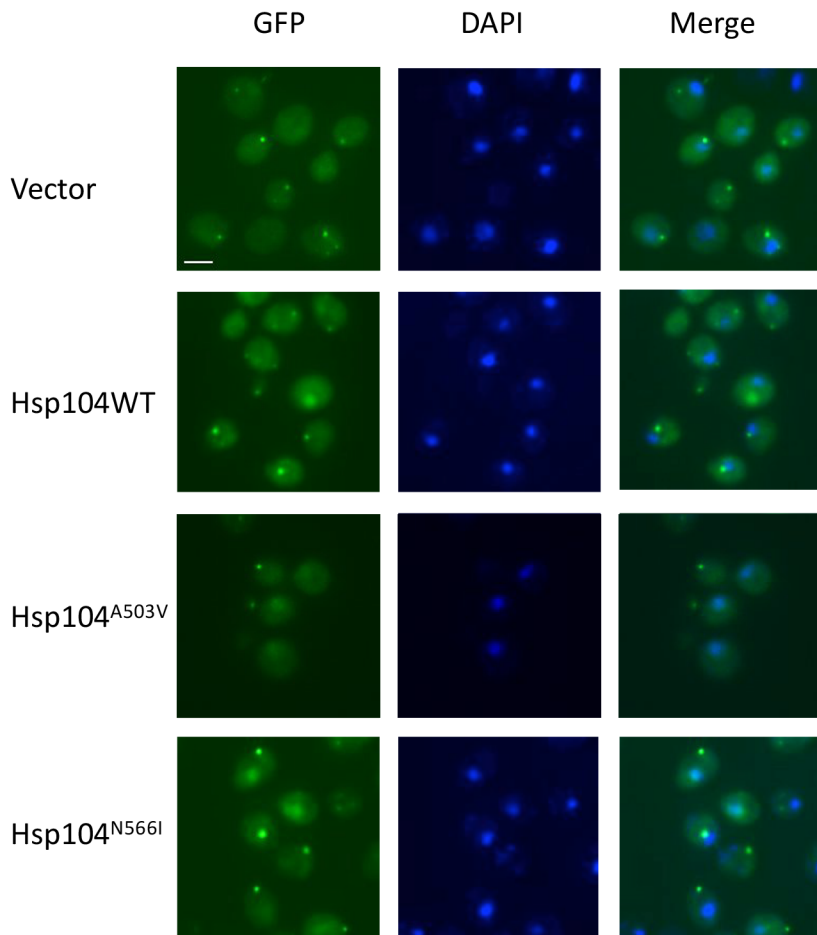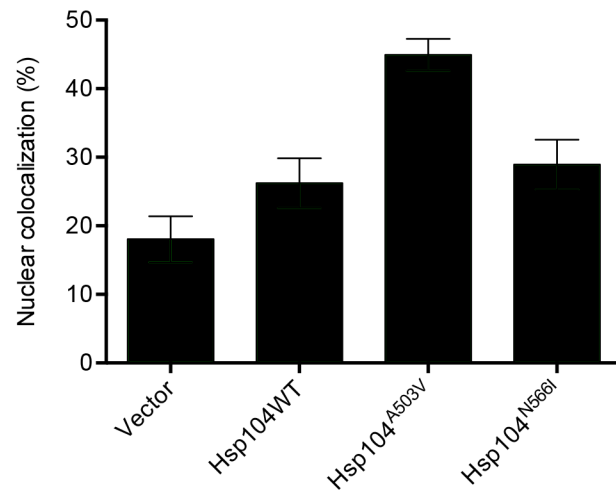

**Figure S7. Hsp104<sup>N566I</sup> does not suppress TDP-43 aggregation or restore TDP-43 to the nucleus in yeast. Related to Figure 7.** Fluorescence microscopy of W303aΔ*hsp104* yeast cells coexpressing fluorescently tagged TDP-43 and the indicated Hsp104 variants or vector control. Strains were induced for 5h in galactose, fixed, and stained with DAPI (blue) to visualize nuclei. Scale bar, 2.5μm. TDP-43 localization was quantified by calculating the proportion of cells containing colocalized nuclear staining. Values represent means ± SEM (n=3).
